# Supplementary material
Source: PubMed Central journal article supplement (PMC3610570)
Supplement: NIHMS328400-supplement-Figure_9.pdf [file NIHMS328400-supplement-Figure_9.pdf]

Number of genes with binding sites within 50kb

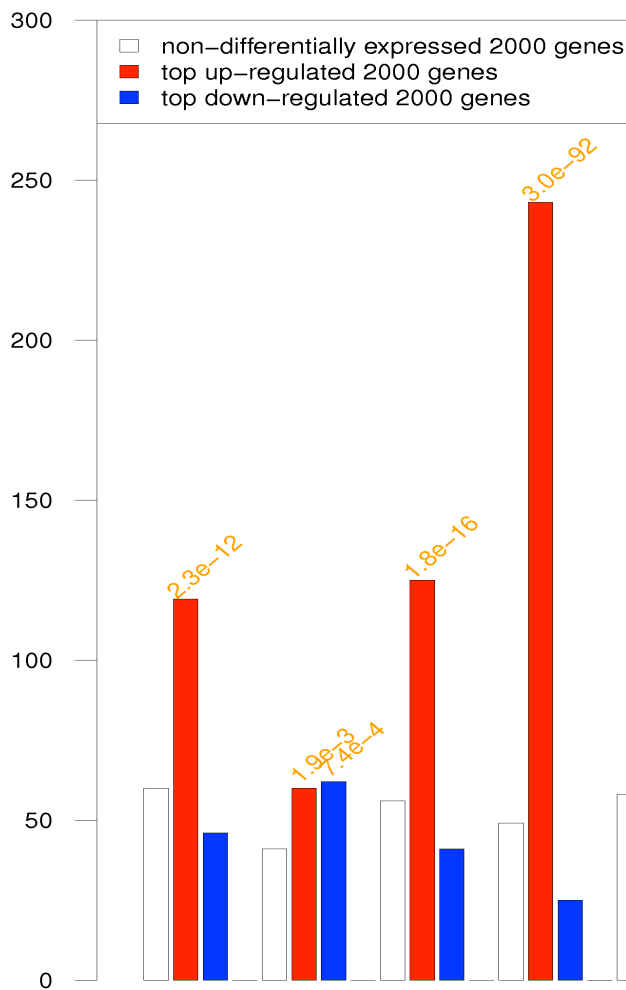

AR\_human\_LnCap\_R1881\_Chinnaiyan  
ESR1\_human\_MCF7\_E2\_Carroll  
ESR2\_human\_U2OS\_E2\_Leitman  
NR3C1\_human\_A594\_DEX\_Myers  
HNF4A\_human\_hepG2\_NT\_Odom  
PPARG\_mouse\_adipocyte\_NT\_Lazar  
PGR\_human\_T47D\_P4\_Brown  
RARA\_human\_MCF7\_AM580\_White  
RARG\_human\_MCF7\_CD437\_White  
VDR\_human\_lymphoblastoid(GM10855)\_vitaminD\_Knight
