# Supplementary material
Source: PubMed Central journal article supplement (PMC3610570)
Supplement: NIHMS328400-supplement-Table_1.pdf [file NIHMS328400-supplement-Table_1.pdf]

**Supplementary Table 1.** Datasets used in figure 1.

| <b>Species</b> | <b>Cell type</b>        | <b>Cell origin</b>      | <b>Factor</b> | <b>Condition</b> | <b>Lab</b>                       |
|----------------|-------------------------|-------------------------|---------------|------------------|----------------------------------|
| Human          | LnCaP                   | prostate                | AR            | R1881(16hr)      | Arul Chinnaiyan <sup>a</sup>     |
| Human          | MCF-7                   | breast                  | ESR1          | E2(45min)        | Jason Carroll <sup>b</sup>       |
| Human          | U2OS cells              | osteosarcoma            | ESR2          | E2(18hr)         | Dale Leitman <sup>c</sup>        |
| Mouse          | E14 ES cell             | ES cell                 | ESRRB         | No treatment     | Huck-Hui Ng <sup>d</sup>         |
| Human          | A594 cells              | lung                    | NR3C1         | DEX(1hr)         | Richard Myers <sup>e</sup>       |
| Human          | HepG2 liver cells       | liver                   | HNF4A         | No treatment     | Duncan Odom <sup>f</sup>         |
| Mouse          | RAW264.7 macrophages    | hematopoietic stem cell | NR1H2         | GW3965(1hr)      | Christopher Glass <sup>g</sup>   |
| Mouse          | 3T3-L1 adipocytes       | adipocytes              | PPARG         | No treatment     | Mitch Lazar <sup>h</sup>         |
| Human          | T47D                    | breast                  | PGR           | E2(45min)        | Myles Brown <sup>i</sup>         |
| Human          | MCF-7                   | breast                  | RARA          | AM580(1hr)       | Kevin White <sup>j</sup>         |
| Human          | MCF-7                   | breast                  | RARG          | CD437(1hr)       | Kevin White <sup>k</sup>         |
| Human          | NB4 cells               | hematopoietic stem cell | RXR           | No treatment     | Hendrik Stunnenberg <sup>l</sup> |
| Human          | lymphoblastoid(GM10855) | hematopoietic stem cell | VDR           | calcitriol(36hr) | Julian Knight <sup>m</sup>       |

a) Yu et al., 2010, b) Hurtado et al., 2008, c) Vivar et al., 2010, d) Chen et al., 2008, e) Reddy et al., 2009, f) Schmidt et al., 2010, g) Heinz et al., 2010, h) Lefterova et al., 2008, i)unpublished, j) Hua et al., 2009, k) Hua et al., 2009, l) Martens et al., 2010, m) Ramagopalan et al., 2010
