# Supplementary material
Source: PubMed Central journal article supplement (PMC3610570)

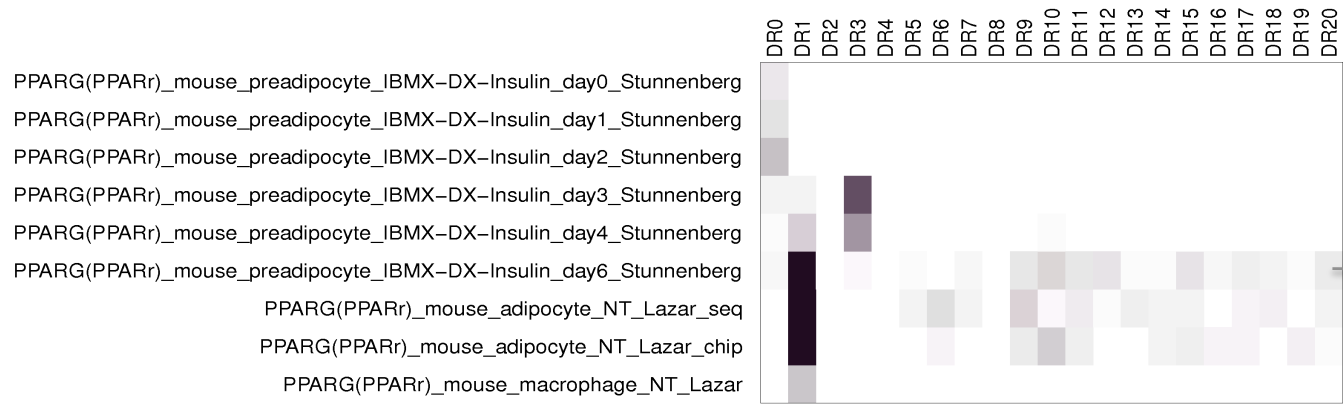

day6\_DR1

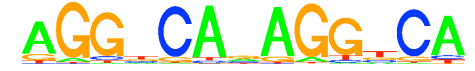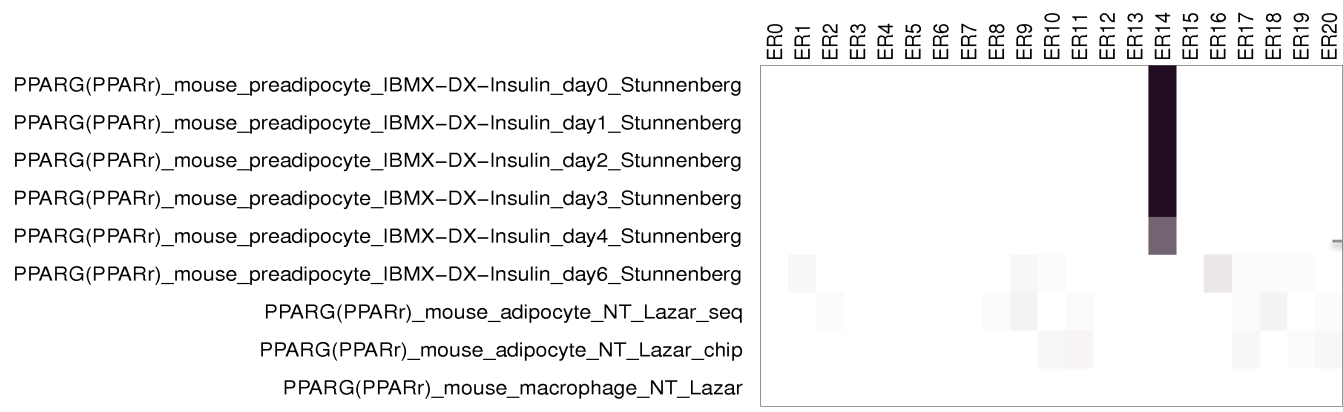

day4\_ER14

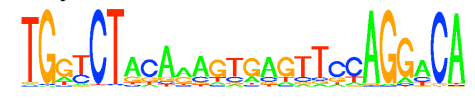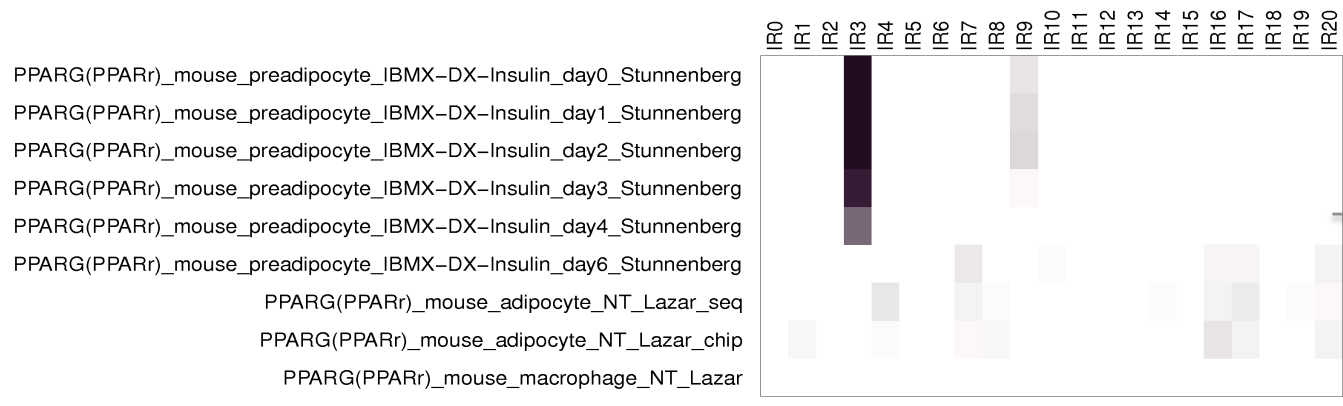

day4\_IR3

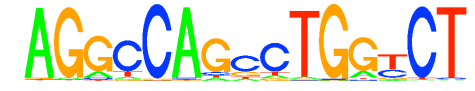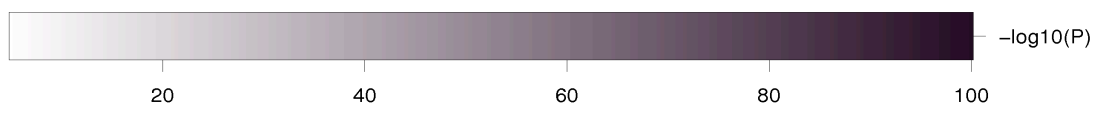

Supplement: NIHMS328400-supplement-Figure_1.pdf [file NIHMS328400-supplement-Figure_1.pdf]

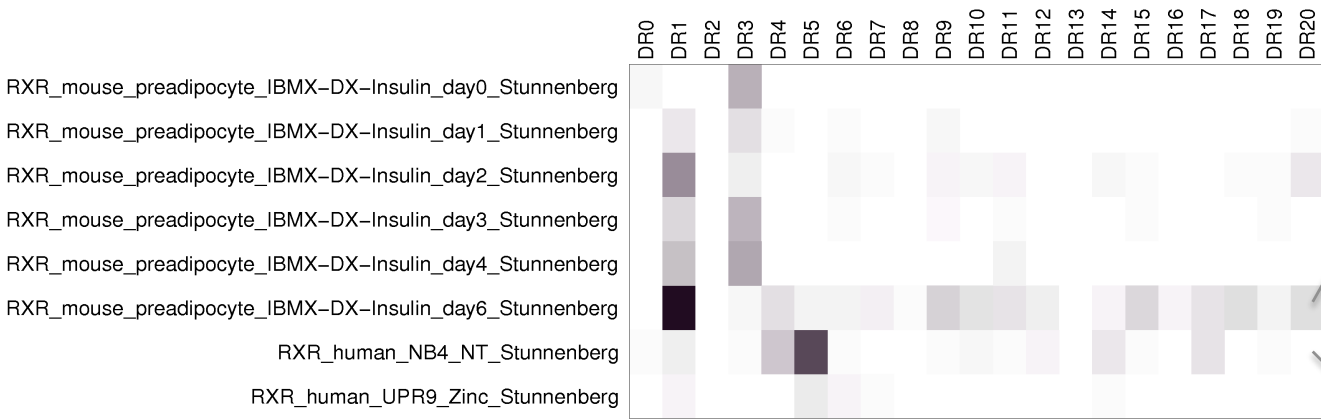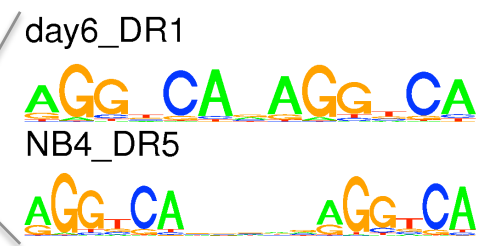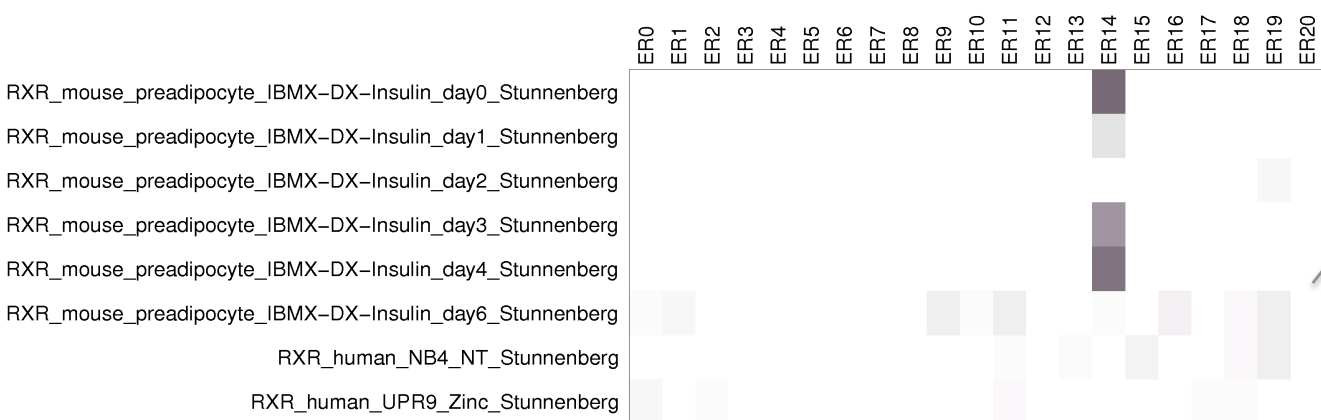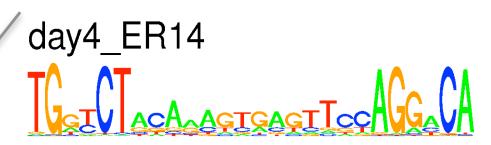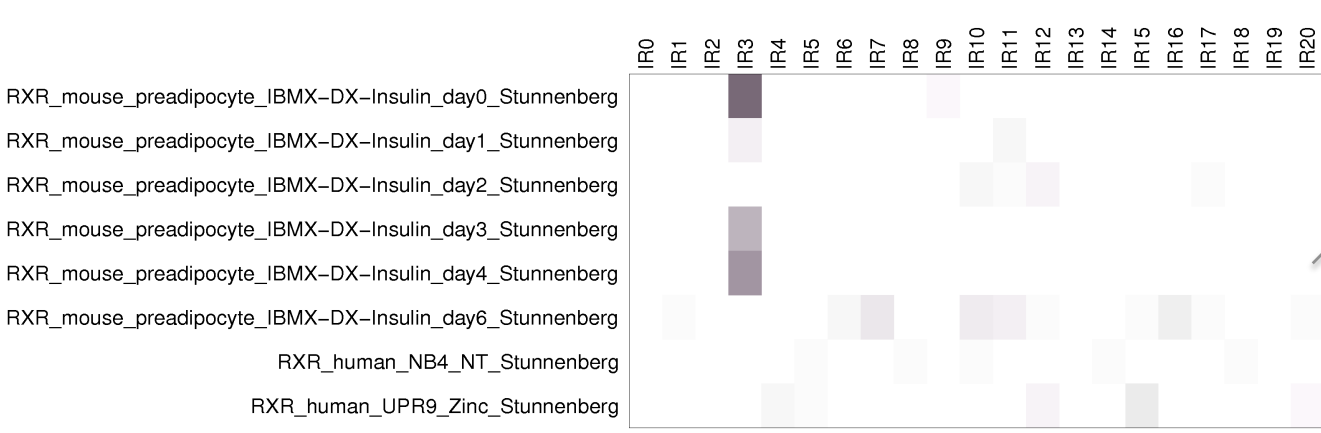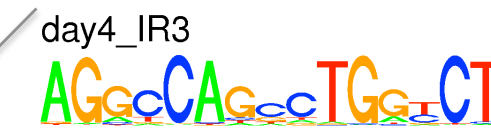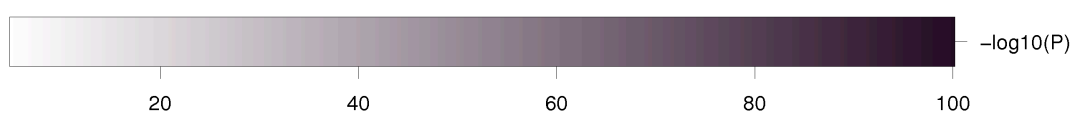

Supplement: NIHMS328400-supplement-Figure_2.pdf [file NIHMS328400-supplement-Figure_2.pdf]
